# Supplementary material
Source: Springer Nature journal article supplement (https://www.springermedizin.de/resource/supplementary/12888_2009_603_MOESM2_ESM.pdf/9483706)
Supplement: MOESM2 [file 9483706]

## Study Type

### Qualitative

1. Description of the sampling (brief description and opinion)  
(inadequate = 0; adequate = 1)
2. How data was collected (brief description and opinion)  
(inadequate = 0; adequate = 1)
3. Independent inspection of data? (How many raters were there?)  
(1 rater = 0; >1 rater = 1)
4. Was there a clear description of data analysis?  
(No = 0; Yes = 1)
5. Use of supportive quantitative methods?  
(No = 0; Yes = 1)

**x/5**

### Quantitative

1. Population size (<100 = 0; ≥100 = 1)
2. Number of facilities involved (1 facility = 0; >1 facility = 1)
3. Design (max = 9; min = 1)
  - a. Clear question/hypothesis (No = 0; Yes = 1)
  - b. Type of study
    - i. Hierarchy of evidence
      1. systematic review & meta-analysis (Yes = 7)
      2. RCT (Yes = 6)
      3. Cohort study (Yes = 5)
      4. Case-control study (Yes = 4)
      5. Cross-sectional study (Yes = 3)
      6. Expert opinion/case history/descriptive review/before and after study (Yes = 2)
      7. Anecdotal (Yes = 1)
    - c. Participant eligibility and recruitment relevant to our DEMoB study group (No = 0; Yes = 1)
  - d. Data analysis
    - a. Clear analysis plan (No = 0; Yes = 1)
    - b. Reporting on all participants (No = 0; Yes = 1)
    - c. Clear results (No = 0; Yes = 1)

**x/14**
